# Supplementary material
Source: Research Square preprint supplement (doi:10.21203/rs.3.rs-8480126/v1)
Supplement: Supplementary file 1 [file b4abab1a2a1026fc69ce4938.pdf]

## **Performance of Vision–Language Models Compared with 252 Medical Students on Text-only and Image-based Dermatology Examinations**

Ozan Erdem, Asst. Prof. Dr.<sup>1</sup>, Abdurrahim Yılmaz, MS<sup>2</sup>, Ahmet Sait Şahin, MD<sup>1</sup>, Buğra Burç Dağtaş, MD<sup>3</sup>, Ece Gökyayla, Asst. Prof. Dr.<sup>4</sup>, Melek Aslan Kayıran, Assoc. Prof. Dr.<sup>1</sup>, Vefa Aslı Erdemir, Prof. Dr.<sup>1</sup>, Mehmet Salih Gürel, Prof. Dr.<sup>1</sup>

<sup>1</sup>Department of Dermatology and Venereology, Istanbul Medeniyet University, Istanbul, Turkey

<sup>2</sup> Division of Systems Medicine, Department of Metabolism, Digestion and Reproduction, Imperial College London, London, UK

<sup>3</sup>Department of Dermatology and Venereology, Health Sciences University, Istanbul Teaching and Research Hospital, Istanbul, Turkey

<sup>4</sup>Department of Dermatology and Venereology, Ege University, Istanbul, Turkey

## Supplementary Information 2. Undergraduate Dermatology Clerkship Text-only

### Examination

This supplementary file presents the complete content of the standardized text-only undergraduate dermatology clerkship examination used in this study. The examination was designed and administered by faculty members and applied for both student assessment and AI model evaluation. All questions were originally written in Turkish and were used without modification during model testing, with English translations provided for reference. The examination administered on 22 September 2023 represents the first evaluated examination in the study dataset. The full set of questions, standardized prompt templates, and the corresponding expert-validated answer key are provided.

**Table S2.1. Text-only multiple-choice questions**

| Original Turkish Question                                                                                                                                                      | English Translation                                                                                                                                                       |
|--------------------------------------------------------------------------------------------------------------------------------------------------------------------------------|---------------------------------------------------------------------------------------------------------------------------------------------------------------------------|
| <p><b>1. Desmozomlara sahip olan hücreyi işaretleyiniz.</b></p> <p>a) Merkel hücresi<br/>b) Melanositler<br/>c) Langerhans hücresi<br/>d) Sebositler<br/>e) Keratinositler</p> | <p><b>1. Indicate the cell type that possesses desmosomes.</b></p> <p>a) Merkel cell<br/>b) Melanocytes<br/>c) Langerhans cell<br/>d) Sebocytes<br/>e) Keratinocytes</p>  |
| <p><b>2. Hemidesmozomal plakta bulunan adezyon molekülünü işaretleyiniz.</b></p> <p>a) Filagrin<br/>b) Desmoglein<br/>c) Desmokollin<br/>d) BP180<br/>e) Seramid</p>           | <p><b>2. Indicate the adhesion molecule found in the hemidesmosomal plaque.</b></p> <p>a) Filaggrin<br/>b) Desmoglein<br/>c) Desmocollin<br/>d) BP180<br/>e) Ceramide</p> |

|                                                                                                                                                                                                                                                                                                                                                                                                                         |                                                                                                                                                                                                                                                                                                                                                                                                                                                                            |
|-------------------------------------------------------------------------------------------------------------------------------------------------------------------------------------------------------------------------------------------------------------------------------------------------------------------------------------------------------------------------------------------------------------------------|----------------------------------------------------------------------------------------------------------------------------------------------------------------------------------------------------------------------------------------------------------------------------------------------------------------------------------------------------------------------------------------------------------------------------------------------------------------------------|
| <p><b>3. Melanositler hakkında yanlış olanı işaretleyiniz.</b></p> <p>a) Nöroektodermal kökenli hücrelerdir.</p> <p>b) Deri ve saça rengini verir.</p> <p>c) Derinin stratum spinozum tabakasında bulunur.</p> <p>d) Melanin granül miktarı kişiden kişiye farklılık gösterse de melanosit sayısı sabittir.</p> <p>e) Melanositler tarafından üretilen melanin dentritik yapılarla keratinositlere transfer edilir.</p> | <p><b>3. Indicate the incorrect statement regarding melanocytes.</b></p> <p>a) They are cells of neuroectodermal origin.</p> <p>b) They provide color to the skin and hair.</p> <p>c) They are located in the stratum spinosum of the epidermis.</p> <p>d) Although the amount of melanin granules varies among individuals, the number of melanocytes is constant.</p> <p>e) Melanin produced by melanocytes is transferred to keratinocytes via dendritic processes.</p> |
| <p><b>4. Büllöz pemfigoid tanısını koyarken hangisi görülür?</b></p> <p>a) Bazal membran boyunca lineer IgG</p> <p>b) İntraepitelyal IgA</p> <p>c) İntraepitelyal IgG</p> <p>d) Bazal membran boyunca granüler IgA</p> <p>e) Bazal membran boyunca granüler IgG</p>                                                                                                                                                     | <p><b>4. Which finding is observed when diagnosing bullous pemphigoid?</b></p> <p>a) Linear IgG deposition along the basement membrane</p> <p>b) Intraepithelial IgA</p> <p>c) Intraepithelial IgG</p> <p>d) Granular IgA along the basement membrane</p> <p>e) Granular IgG along the basement membrane</p>                                                                                                                                                               |
| <p><b>5. Ürtika için doğru olmayanı işaretleyiniz.</b></p> <p>a) Saatler içinde değişir.</p> <p>b) &lt;24 saat içinde kaybolur.</p> <p>c) Deriden hafifçe kabarıktır</p> <p>d) Epidermal değişiklikler görülebilir</p> <p>e) Dermal ödem sonucu ortaya çıkar</p>                                                                                                                                                        | <p><b>5. Indicate the incorrect statement regarding urticaria.</b></p> <p>a) It changes within hours.</p> <p>b) It resolves within &lt;24 hours.</p> <p>c) It is slightly elevated from the skin surface.</p> <p>d) Epidermal changes may be observed.</p> <p>e) It results from dermal edema.</p>                                                                                                                                                                         |
| <p><b>6. Skabiyez klinik bulgusu olmayanı işaretleyiniz.</b></p> <p>a) Gece uykudan uyandırır</p> <p>b) Kaşıntı sıcakla artar</p> <p>c) Kaşıntı steroid ve antihistaminiklere iyi yanıt verir</p>                                                                                                                                                                                                                       | <p><b>6. Indicate the feature that is NOT a clinical finding of scabies.</b></p> <p>a) Pruritus that awakens the patient at night</p> <p>b) Pruritus worsens with heat</p>                                                                                                                                                                                                                                                                                                 |

|                                                                                                                                                                                                                                                                                                                                                                                                                                                      |                                                                                                                                                                                                                                                                                                                                                                                                                                                         |
|------------------------------------------------------------------------------------------------------------------------------------------------------------------------------------------------------------------------------------------------------------------------------------------------------------------------------------------------------------------------------------------------------------------------------------------------------|---------------------------------------------------------------------------------------------------------------------------------------------------------------------------------------------------------------------------------------------------------------------------------------------------------------------------------------------------------------------------------------------------------------------------------------------------------|
| <p>d) Cinsel yolla bulaşabilir</p> <p>e) Bebeklerde yüz ve saçlı deri tutulabilir</p>                                                                                                                                                                                                                                                                                                                                                                | <p>c) Pruritus responds well to steroids and antihistamines</p> <p>d) It may be transmitted sexually</p> <p>e) The face and scalp may be involved in infants</p>                                                                                                                                                                                                                                                                                        |
| <p><b>7. Pemfigus vulgaris'te başlıca hangisine karşı antikor gelişir?</b></p> <p>a) BP180</p> <p>b) BP230</p> <p>c) Laminin</p> <p>d) Kollajen VII</p> <p>e) Desmoglein</p>                                                                                                                                                                                                                                                                         | <p><b>7. In pemphigus vulgaris, antibodies primarily develop against which target?</b></p> <p>a) BP180</p> <p>b) BP230</p> <p>c) Laminin</p> <p>d) Collagen VII</p> <p>e) Desmoglein</p>                                                                                                                                                                                                                                                                |
| <p><b>8. Kutanoz leişmaniyazis kuşkusunu uyandırmayana işaretleyiniz.</b></p> <p>a) En az bir aydır devam etmesi</p> <p>b) Ağrısız olması</p> <p>c) Vezikül, bül, püstül gibi elemanter lezyonlar</p> <p>d) Endemik bölgede yaşama veya seyahat</p> <p>e) Giysiyle örtülmeyen lokalizasyon</p>                                                                                                                                                       | <p><b>8. Indicate the feature that does NOT raise suspicion for cutaneous leishmaniasis.</b></p> <p>a) Persistence for at least one month</p> <p>b) Painless nature</p> <p>c) Elementary lesions such as vesicles, bullae, or pustules</p> <p>d) Residence in or travel to an endemic area</p> <p>e) Localization on uncovered body sites</p>                                                                                                           |
| <p><b>9. Derinin benign tümörleri ile ilgili olarak hangisi doğrudur?</b></p> <p>a) Seboreik keratozlar üzerinden skuamoz hücreli karsinom gelişebilir.</p> <p>b) Çocuklarda en sık görülen deri tümörü epidermoid kisttir.</p> <p>c) Papülozis nigra melanositik tümördür.</p> <p>d) Ani ortaya çıkan epidermoid kistler Leser-Trélat sendromunun belirticidir</p> <p>e) Epidermal kistler düzgün şekilli, üzerinde punktum içeren nodüllerdir.</p> | <p><b>9. Which statement regarding benign tumors of the skin is correct?</b></p> <p>a) Squamous cell carcinoma may arise from seborrheic keratoses.</p> <p>b) The most common skin tumor in children is the epidermoid cyst.</p> <p>c) Dermatitis papulosa nigra is a melanocytic tumor.</p> <p>d) Sudden onset of epidermoid cysts is a marker of the Leser-Trélat sign.</p> <p>e) Epidermal cysts are well-shaped nodules with a central punctum.</p> |

|                                                                                                                                                                                                                                                                                                                                                                                                               |                                                                                                                                                                                                                                                                                                                                                                                                                                                                          |
|---------------------------------------------------------------------------------------------------------------------------------------------------------------------------------------------------------------------------------------------------------------------------------------------------------------------------------------------------------------------------------------------------------------|--------------------------------------------------------------------------------------------------------------------------------------------------------------------------------------------------------------------------------------------------------------------------------------------------------------------------------------------------------------------------------------------------------------------------------------------------------------------------|
| <p><b>10. Aşağıdakilerden hangisi Skuamöz Hücreli Karsinomun (SHK) özellikleri arasındadır?</b></p> <p>a) SHK mukozaları tutabilir.</p> <p>b) SHK en sık gövdede yerleşir.</p> <p>c) Nodüler SHK en sık görülen tipidir.</p> <p>d) Seboreik keratoz zemininden gelişebilirler.</p> <p>e) Nadiren metastaz yapar.</p>                                                                                          | <p><b>10. Which of the following is a characteristic feature of squamous cell carcinoma (SCC)?</b></p> <p>a) SCC may involve mucosal surfaces.</p> <p>b) SCC most commonly occurs on the trunk.</p> <p>c) Nodular SCC is the most common subtype.</p> <p>d) It may arise from seborrheic keratosis.</p> <p>e) It rarely metastasizes.</p>                                                                                                                                |
| <p><b>11. Psoriasis için aşağıdaki verilenlerden hangisi doğrudur?</b></p> <p>a) HLA CW6 ile tırnak psoriazisi arasında güçlü bir ilişki mevcuttur.</p> <p>b) Hipokalsemi püstüler psoriasis etiolojisinde yer alır.</p> <p>c) Epidermal turn-over süresi uzamıştır.</p> <p>d) Nikolsky fenomeni pozitifdir.</p> <p>e) Saçlı deri tutulumunda saçlı deri sınırını aşmaması karakteristiktir.</p>              | <p><b>11. Which of the following statements about psoriasis is correct?</b></p> <p>a) There is a strong association between HLA-Cw6 and nail psoriasis.</p> <p>b) Hypocalcemia is involved in the etiology of pustular psoriasis.</p> <p>c) Epidermal turnover time is prolonged.</p> <p>d) The Nikolsky sign is positive.</p> <p>e) In scalp involvement, lesions characteristically do not extend beyond the hairline.</p>                                             |
| <p><b>12. Tinea kapitis ile ilgili olarak hangisi doğrudur?</b></p> <p>a) Tinea kapitis superfisiyalis puberteden sonra görülmez.</p> <p>b) Saçta en sık enfeksiyon yapan dermatofit Epidermofitondur.</p> <p>c) <i>Microsporum canis</i> endotriks tutulum yapar.</p> <p>d) Tinea kapitis enfeksiyonunda sistemik steroid ilk seçenektir.</p> <p>e) Trikofiton wood ışığı ile mavi-yeşil floresan verir.</p> | <p><b>12. Which of the following statements about tinea capitis is correct?</b></p> <p>a) Superficial tinea capitis does not occur after puberty.</p> <p>b) The most common dermatophyte infecting hair is <i>Epidermophyton</i>.</p> <p>c) <i>Microsporum canis</i> causes endothrix involvement.</p> <p>d) Systemic steroids are the first-line treatment for tinea capitis.</p> <p>e) <i>Trichophyton</i> species show blue-green fluorescence under Wood's lamp.</p> |
| <p><b>13. Eritema enfeksiyozum etkeni aşağıdakilerden hangisidir?</b></p>                                                                                                                                                                                                                                                                                                                                     | <p><b>13. Which of the following is the causative agent of erythema infectiosum?</b></p>                                                                                                                                                                                                                                                                                                                                                                                 |

|                                                                                                                                                                                                                                                                                                                                                                                                                                                                                                   |                                                                                                                                                                                                                                                                                                                                                                                                                                                                                                                           |
|---------------------------------------------------------------------------------------------------------------------------------------------------------------------------------------------------------------------------------------------------------------------------------------------------------------------------------------------------------------------------------------------------------------------------------------------------------------------------------------------------|---------------------------------------------------------------------------------------------------------------------------------------------------------------------------------------------------------------------------------------------------------------------------------------------------------------------------------------------------------------------------------------------------------------------------------------------------------------------------------------------------------------------------|
| <p>a) HSV tip 1</p> <p>b) Parvo virüs B-19</p> <p>c) HPV</p> <p>d) Pox virüs</p> <p>e) HHV6</p>                                                                                                                                                                                                                                                                                                                                                                                                   | <p>a) HSV type 1</p> <p>b) Parvovirus B19</p> <p>c) HPV</p> <p>d) Poxvirus</p> <p>e) HHV6</p>                                                                                                                                                                                                                                                                                                                                                                                                                             |
| <p><b>14. Aşı karşıtı bir ailenin 3 yaşındaki çocuğu polikliniğe 37.8 derece ateş, üst solunum yolu enfeksiyon bulguları, suboksipital lenfadenopati, yüzden başlayan kaşıntılı makülopapüler döküntü ile başvuruyor. Hastada viral döküntü düşünülüp parasetamol şurup tedavisi başlanıyor. Döküntünün 3 gün içinde gerilediği görülüyor. Muhtemel tanınız nedir?</b></p> <p>a) Kızamık</p> <p>b) Coksaki enfeksiyonu</p> <p>c) Kızamıkçık</p> <p>d) Eritema enfeksiyozum</p> <p>e) Kawasaki</p> | <p><b>14. A 3-year-old child from an anti-vaccination family presents with a temperature of 37.8°C, upper respiratory tract infection symptoms, suboccipital lymphadenopathy, and a pruritic maculopapular rash starting on the face. A viral exanthem is suspected and paracetamol syrup is initiated. The rash resolves within three days. What is the most likely diagnosis?</b></p> <p>a) Measles</p> <p>b) Coxsackie virus infection</p> <p>c) Rubella</p> <p>d) Erythema infectiosum</p> <p>e) Kawasaki disease</p> |
| <p><b>15. Aşağıdakilerden hangisi Eritema nodozum etiyolojisinde yer almaz?</b></p> <p>a) Streptokoksik enfeksiyonlar</p> <p>b) D vitamini eksikliği</p> <p>c) Sarkoidoz</p> <p>d) Gebelik</p> <p>e) İyodür-bromür içeren ilaçlar</p>                                                                                                                                                                                                                                                             | <p><b>15. Which of the following is NOT included in the etiology of erythema nodosum?</b></p> <p>a) Streptococcal infections</p> <p>b) Vitamin D deficiency</p> <p>c) Sarcoidosis</p> <p>d) Pregnancy</p> <p>e) Iodide- or bromide-containing medications</p>                                                                                                                                                                                                                                                             |
| <p><b>16. Aşağıdakilerden hangisi vitiligoya ait özellik değildir?</b></p> <p>a) Vitiligo yenidoğan-bebeklik döneminde pik yapar.</p> <p>b) Melanositler sitotoksik T hücrelerince yok edilmiştir.</p>                                                                                                                                                                                                                                                                                            | <p><b>16. Which of the following is NOT a characteristic feature of vitiligo?</b></p> <p>a) Vitiligo peaks in the neonatal–infantile period.</p> <p>b) Melanocytes are destroyed by cytotoxic T cells.</p> <p>c) The Koebner phenomenon is positive.</p>                                                                                                                                                                                                                                                                  |

|                                                                                                                                                                                                                                                                                                     |                                                                                                                                                                                                                                                                                                                                                                   |
|-----------------------------------------------------------------------------------------------------------------------------------------------------------------------------------------------------------------------------------------------------------------------------------------------------|-------------------------------------------------------------------------------------------------------------------------------------------------------------------------------------------------------------------------------------------------------------------------------------------------------------------------------------------------------------------|
| <p>c) K bner fenomeni pozitifdir</p> <p>d) Depigmentasyon mevcuttur.</p> <p>e) Tanıda wood ışığı ile porselen beyazı refle alınır.</p>                                                                                                                                                              | <p>d) Depigmentation is present.</p> <p>e) A porcelain-white fluorescence is observed under Wood's lamp.</p>                                                                                                                                                                                                                                                      |
| <p><b>17. Anjio dem ile ilgili yanlış işaretleyiniz.</b></p> <p>a) Derin dermis ve subkutan dokuda  demle karakterizedir.</p> <p>b) Ağrı veya yanma eşlik edebilir.</p> <p>c) Birkaç g n s rebilir.</p> <p>d) Nefes darlığına neden olabilir.</p> <p>e) Sadece akut  rtiker tablosunda g r l r.</p> | <p><b>17. Indicate the incorrect statement regarding angioedema.</b></p> <p>a) It is characterized by edema of the deep dermis and subcutaneous tissue.</p> <p>b) Pain or burning may accompany the swelling.</p> <p>c) It may last for several days.</p> <p>d) It may cause shortness of breath.</p> <p>e) It occurs only in the setting of acute urticaria.</p> |
| <p><b>18. Telogen effluvium Őik yeti ile gelen hastadan hangi kan tetkikini ilk etapta istemeye gerek yoktur?</b></p> <p>a) Tiroid fonksiyon testleri</p> <p>b) Serum ferritin</p> <p>c) Vitamin B12 ve folik asit</p> <p>d) CRP</p> <p>e) Tam kan sayımı</p>                                       | <p><b>18. In a patient presenting with telogen effluvium, which laboratory test is NOT necessary in the initial evaluation?</b></p> <p>a) Thyroid function tests</p> <p>b) Serum ferritin</p> <p>c) Vitamin B12 and folic acid</p> <p>d) C-reactive protein</p> <p>e) Complete blood count</p>                                                                    |
| <p><b>19. Hangisi fokal alopesi nedenlerinden deęildir?</b></p> <p>a) Androjenik alopesi</p> <p>b) Alopesi areata</p> <p>c) Trikotillomani</p> <p>d) Traksiyonel alopesi</p> <p>e) Tinea capitis superfisyalis</p>                                                                                  | <p><b>19. Which of the following is NOT a cause of focal alopecia?</b></p> <p>a) Androgenetic alopecia</p> <p>b) Alopecia areata</p> <p>c) Trichotillomania</p> <p>d) Traction alopecia</p> <p>e) Superficial tinea capitis</p>                                                                                                                                   |
| <p><b>20. Hangisi Beh et Hastalığının bulguları arasında sayılmaz?</b></p> <p>a) Herpetiform oral aftlar</p> <p>b) Eritema nodozum</p>                                                                                                                                                              | <p><b>20. Which of the following is NOT considered a manifestation of Beh et disease?</b></p> <p>a) Herpetiform oral aphthae</p> <p>b) Erythema nodosum</p>                                                                                                                                                                                                       |

|                                                                                                                                                                                                                                                                                                                                                                                                                                                                                                                                                                                                                                                                                                                                                                                                                                                                                                       |                                                                                                                                                                                                                                                                                                                                                                                                                                                                                                                                                                                                                                                                                                                                                                                                                                                                                                   |
|-------------------------------------------------------------------------------------------------------------------------------------------------------------------------------------------------------------------------------------------------------------------------------------------------------------------------------------------------------------------------------------------------------------------------------------------------------------------------------------------------------------------------------------------------------------------------------------------------------------------------------------------------------------------------------------------------------------------------------------------------------------------------------------------------------------------------------------------------------------------------------------------------------|---------------------------------------------------------------------------------------------------------------------------------------------------------------------------------------------------------------------------------------------------------------------------------------------------------------------------------------------------------------------------------------------------------------------------------------------------------------------------------------------------------------------------------------------------------------------------------------------------------------------------------------------------------------------------------------------------------------------------------------------------------------------------------------------------------------------------------------------------------------------------------------------------|
| <p>c) Akne keloidalis</p> <p>d) Folikülit benzeri lezyonlar</p> <p>e) Yüzeysel tromboflebit</p>                                                                                                                                                                                                                                                                                                                                                                                                                                                                                                                                                                                                                                                                                                                                                                                                       | <p>c) Acne keloidalis</p> <p>d) Folliculitis-like lesions</p> <p>e) Superficial thrombophlebitis</p>                                                                                                                                                                                                                                                                                                                                                                                                                                                                                                                                                                                                                                                                                                                                                                                              |
| <p><b>21. Raynaud fenomeninde parmaklarda hangi renk değişiklikleri sırasıyla görülür?</b></p> <p>a) Mavi-mor/beyaz/kırmızı</p> <p>b) Beyaz/mavi-mor/kırmızı</p> <p>c) Beyaz/kırmızı/mavi-mor</p> <p>d) Kırmızı/mavi-mor/beyaz</p> <p>e) Mavi-mor/kırmızı/beyaz</p>                                                                                                                                                                                                                                                                                                                                                                                                                                                                                                                                                                                                                                   | <p><b>21. In Raynaud phenomenon, which sequence of color changes is observed in the fingers?</b></p> <p>a) Blue–purple/white/red</p> <p>b) White/blue–purple/red</p> <p>c) White/red/blue–purple</p> <p>d) Red/blue–purple/white</p> <p>e) Blue–purple/red/white</p>                                                                                                                                                                                                                                                                                                                                                                                                                                                                                                                                                                                                                              |
| <p><b>22. 3 aydır vücudunda eritemli ödemli kaşıntılı plak lezyonları çıkıp birkaç saat içinde tamamen iyileştiğini ancak başka bölgede yeniden çıktığını ifade eden hastanın bazen göz kapaklarında da bir iki gün süren şişlikleri oluyormuş. Hasta tedavi olarak her gün standart dozda levosetrisin (ikinci kuşak H1 antihistaminik) kullandığını, kaşıntının azaldığını ancak yeterli gelmediğini ifade ediyor. Hastaya bu aşamada hangi tedaviyi verirsiniz?</b></p> <p>a) Tedavisine akşamları H2 antihistaminik (ör: famotidine) eklerim.</p> <p>b) Aynı dozda başka bir ikinci kuşak H1 antihistaminiğe (ör: desloratadin) geçerim.</p> <p>c) Sistemik kortikosteroidleri düşük doz uzun süre kullanmasını öneririm.</p> <p>d) Kullandığı antihistaminiği günde dört kez alacak şekilde reçete ederim.</p> <p>e) Sistemik kortikosteroidleri yüksek doz kısa süre kullanmasını öneririm.</p> | <p><b>22. A patient reports recurrent erythematous, edematous, pruritic plaque lesions over the past three months that resolve completely within hours but recur in different locations. The patient also experiences eyelid swelling lasting one to two days. The patient has been taking a standard daily dose of levocetirizine (a second-generation H1 antihistamine), which partially relieves pruritus but is insufficient. Which treatment would you recommend at this stage?</b></p> <p>a) Add an H2 antihistamine in the evening (e.g., famotidine).</p> <p>b) Switch to another second-generation H1 antihistamine at the same dose (e.g., desloratadine).</p> <p>c) Recommend long-term low-dose systemic corticosteroids.</p> <p>d) Prescribe the current antihistamine at a four-times-daily dosing schedule.</p> <p>e) Recommend short-term high-dose systemic corticosteroids.</p> |

|                                                                                                                                                                                                                                                                                                                                                                                                                                                                                                                                                                   |                                                                                                                                                                                                                                                                                                                                                                                                                                                                                                                                                |
|-------------------------------------------------------------------------------------------------------------------------------------------------------------------------------------------------------------------------------------------------------------------------------------------------------------------------------------------------------------------------------------------------------------------------------------------------------------------------------------------------------------------------------------------------------------------|------------------------------------------------------------------------------------------------------------------------------------------------------------------------------------------------------------------------------------------------------------------------------------------------------------------------------------------------------------------------------------------------------------------------------------------------------------------------------------------------------------------------------------------------|
| <p><b>23. Uzun süredir kontrolsüz diabetes mellitusu olan bir hastada aşağıdaki deri bulgularından hangisi beklenmez?</b></p> <p>a) Adenoma sebaceum<br/>b) Akantozis nigrikans<br/>c) Nekrobiyozis lipoidika<br/>d) Onikomikoz<br/>e) Nöropatik ayak ülseri</p>                                                                                                                                                                                                                                                                                                  | <p><b>23. Which of the following cutaneous findings is NOT expected in a patient with long-standing uncontrolled diabetes mellitus?</b></p> <p>a) Adenoma sebaceum<br/>b) Acanthosis nigricans<br/>c) Necrobiosis lipoidica<br/>d) Onychomycosis<br/>e) Neuropathic foot ulcer</p>                                                                                                                                                                                                                                                             |
| <p><b>24. Addison hastalığında hangi deri bulgusu beklenir?</b></p> <p>a) Testikuler atrofi<br/>b) Palmar çizgilerde hiperpigmentasyon<br/>c) Hunter dili<br/>d) Kıllarda kayıp<br/>e) Pretibial miksödem</p>                                                                                                                                                                                                                                                                                                                                                     | <p><b>24. Which cutaneous finding is expected in Addison disease?</b></p> <p>a) Testicular atrophy<br/>b) Hyperpigmentation of the palmar creases<br/>c) Hunter's tongue<br/>d) Hair loss<br/>e) Pretibial myxedema</p>                                                                                                                                                                                                                                                                                                                        |
| <p><b>25. 9 yaşındaki erkek çocuk hasta vücudunda doğumdan beri var olan ve sayıları artan kahverengi yamalar nedeniyle başvurdu. Muayenesinde çok sayıda boyutları değişken sülü kahverengi yamalar olduğu görüldü. Annesinde de benzer lekeler ve yumuşak kıvamlı nodüller izlendi. Bu aşamada hastanın tanısına yönelik aşağıdaki bulgularda hangisinin araştırılması gerekli değildir?</b></p> <p>a) Nörofibrom<br/>b) Lisch nodülü<br/>c) Aksiller ve inguinal çillenme<br/>d) Koenen tümörü<br/>e) Santral sinir sistemi tutulumuna yönelik görüntüleme</p> | <p><b>25. A 9-year-old boy presents with multiple light-brown patches present since birth that have increased in number. Physical examination reveals numerous café-au-lait macules of varying sizes. Similar lesions and soft nodules are noted in the mother. Which of the following findings does NOT need to be investigated for diagnostic evaluation at this stage?</b></p> <p>a) Neurofibroma<br/>b) Lisch nodules<br/>c) Axillary and inguinal freckling<br/>d) Koenen tumor<br/>e) Imaging for central nervous system involvement</p> |

|                                                                                                                                                                                                                                            |                                                                                                                                                                                                                                                                                 |
|--------------------------------------------------------------------------------------------------------------------------------------------------------------------------------------------------------------------------------------------|---------------------------------------------------------------------------------------------------------------------------------------------------------------------------------------------------------------------------------------------------------------------------------|
| <p><b>26. Lökositoklastik vaskülitlerin en sık gördüğümüz elementer lezyonu hangisidir?</b></p> <p>a) Palpable purpura<br/>b) Eritemli makul<br/>c) Viyolese plak<br/>d) Süpüre nodul<br/>e) Ülser</p>                                     | <p><b>26. What is the most common elementary lesion observed in leukocytoclastic vasculitis?</b></p> <p>a) Palpable purpura<br/>b) Erythematous macule<br/>c) Violaceous plaque<br/>d) Suppurative nodule<br/>e) Ulcer</p>                                                      |
| <p><b>27. Hangisi liken planus tırnak tutulumu için tipik değildir?</b></p> <p>a) Pterijium<br/>b) Tırnak plağında incelmeye<br/>c) Longitudinal fissürler<br/>d) Onikoreksis<br/>e) Yağ damlası (salmon patch)</p>                        | <p><b>27. Which of the following is NOT typical of nail involvement in lichen planus?</b></p> <p>a) Pterygium<br/>b) Thinning of the nail plate<br/>c) Longitudinal fissures<br/>d) Onychorrhexis<br/>e) Oil drop (salmon patch)</p>                                            |
| <p><b>28. Hangi onikomikoz tipi HIV ile ilişkilidir?</b></p> <p>a) Distal-lateral subungual<br/>b) Süperfisyal beyaz<br/>c) Proksimal subungual<br/>d) Total distrofik<br/>e) Yeşil tırnak</p>                                             | <p><b>28. Which type of onychomycosis is associated with HIV infection?</b></p> <p>a) Distal-lateral subungual<br/>b) Superficial white<br/>c) Proximal subungual<br/>d) Total dystrophic e) Green nail</p>                                                                     |
| <p><b>29. Hangisi HIV pozitif hastalarda görülen ülseratif, nekrotik sifiliz tablosudur?</b></p> <p>a) Rozeola sifilitika<br/>b) Palmoplantar sifilid<br/>c) Kondiloma lata<br/>d) Lues maligna (malign sifiliz)<br/>e) Corona veneris</p> | <p><b>29. Which of the following represents the ulcerative, necrotic form of syphilis observed in HIV-positive patients?</b></p> <p>a) Syphilitic roseola<br/>b) Palmoplantar syphilid<br/>c) Condyloma lata<br/>d) Lues maligna (malignant syphilis)<br/>e) Corona veneris</p> |
| <p><b>30. Pitiriazis rozea için uygun olmayanı işaretleyiniz.</b></p>                                                                                                                                                                      | <p><b>30. Indicate the statement that is NOT appropriate for pityriasis rosea.</b></p>                                                                                                                                                                                          |

|                                                                                                                                                                                                                                                                               |                                                                                                                                                                                                                                                                                                                                        |
|-------------------------------------------------------------------------------------------------------------------------------------------------------------------------------------------------------------------------------------------------------------------------------|----------------------------------------------------------------------------------------------------------------------------------------------------------------------------------------------------------------------------------------------------------------------------------------------------------------------------------------|
| <p>a) Etiyolojide HHV-6 ve HHV-7 reaktivasyonu suçlanmaktadır</p> <p>b) Sırtta çam ağacı şeklinde dağılım gösterir</p> <p>c) Madalyon plak ilk çıkan öncü lezyondur</p> <p>d) Gebelerde fetal kayıp ve düşük ile ilişkilendirilmiştir</p> <p>e) Tanı için biyopsi şarttır</p> | <p>a) Reactivation of HHV-6 and HHV-7 is implicated in the etiology.</p> <p>b) It shows a “Christmas tree” distribution on the back.</p> <p>c) The herald patch is the initial presenting lesion.</p> <p>d) It has been associated with fetal loss and miscarriage in pregnant women.</p> <p>e) Biopsy is mandatory for diagnosis.</p> |
| <p><b>31. Hangisi idiyosenkrazik bir ilaç reaksiyonu değildir?</b></p> <p>a) Ürtiker-anjioödem</p> <p>b) DRESS</p> <p>c) Stevens–Johnson Sendromu</p> <p>d) Toksik epidermal nekroliz</p> <p>e) Akut generalize ekzantematöz püstülozis</p>                                   | <p><b>31. Which of the following is NOT an idiosyncratic drug reaction?</b></p> <p>a) Urticaria–angioedema</p> <p>b) DRESS</p> <p>c) Stevens–Johnson syndrome</p> <p>d) Toxic epidermal necrolysis</p> <p>e) Acute generalized exanthematous pustulosis</p>                                                                            |

**Table S2.2. Text-only multiple-selection questions**

| Original Turkish Question                                                                                                                                                                                                                                          | English Translation                                                                                                                                                                                                                                                    |
|--------------------------------------------------------------------------------------------------------------------------------------------------------------------------------------------------------------------------------------------------------------------|------------------------------------------------------------------------------------------------------------------------------------------------------------------------------------------------------------------------------------------------------------------------|
| <p><b>32. İz bırakmadan sikatrissiz tamamen iyileşebilenleri işaretleyiniz.</b></p> <p>a) Vitiligo</p> <p>b) Eritema multiforme</p> <p>c) Nodülökistik akne</p> <p>d) Diskoid lupus eritematozus</p> <p>e) Psöriyazis vulgaris</p> <p>f) Kutanöz layşmaniyazis</p> | <p><b>32. Indicate the conditions that can heal completely without scarring.</b></p> <p>a) Vitiligo</p> <p>b) Erythema multiforme</p> <p>c) Nodulocystic acne</p> <p>d) Discoid lupus erythematosus</p> <p>e) Psoriasis vulgaris</p> <p>f) Cutaneous leishmaniasis</p> |
| <p><b>33. Deriden kabarık olan lezyonları işaretleyin.</b></p> <p>a) Pemfigus vulgaris</p> <p>b) Vitiligo</p>                                                                                                                                                      | <p><b>33. Indicate the lesions that are elevated above the skin surface.</b></p> <p>a) Pemphigus vulgaris</p>                                                                                                                                                          |

|                                                                                                                                                                                                                                                                                                                                                |                                                                                                                                                                                                                                                                                                                                                                                                          |
|------------------------------------------------------------------------------------------------------------------------------------------------------------------------------------------------------------------------------------------------------------------------------------------------------------------------------------------------|----------------------------------------------------------------------------------------------------------------------------------------------------------------------------------------------------------------------------------------------------------------------------------------------------------------------------------------------------------------------------------------------------------|
| <p>c) Verruca vulgaris</p> <p>d) Liken planus</p> <p>e) Lentigo</p> <p>f) Tinea versikolor</p>                                                                                                                                                                                                                                                 | <p>b) Vitiligo</p> <p>c) Verruca vulgaris</p> <p>d) Lichen planus</p> <p>e) Lentigo</p> <p>f) Tinea versicolor</p>                                                                                                                                                                                                                                                                                       |
| <p><b>34. Dermatolojide klinik tanıda görsel/visual tanımının özelliklerini işaretleyiniz.</b></p> <p>a) Hızlıdır</p> <p>b) Analiz-sentez ve muhakeme gerektirir</p> <p>c) Önceden öğrenmiş olmayı gerektirir</p> <p>d) Tetkik ön inceleme gerektirmez</p> <p>e) Algoritmalar kullanılır</p> <p>f) Hiç karşılaşılmamış lezyonları çözümler</p> | <p><b>34. Indicate the characteristics of visual recognition in clinical dermatologic diagnosis.</b></p> <p>a) It is rapid.</p> <p>b) It requires analysis, synthesis, and reasoning.</p> <p>c) It requires prior learning.</p> <p>d) It does not require preliminary diagnostic testing.</p> <p>e) Algorithms are used.</p> <p>f) It can interpret lesions that have never been encountered before.</p> |
| <p><b>35. Aşağıdakilerden hangileri malign melanom tipleridir?</b></p> <p>a) Yüzeyel yayılan</p> <p>b) Pinkus tümörü</p> <p>c) Nodüler</p> <p>d) Metatipik</p> <p>e) Akral lentiginöz</p> <p>f) Morfeiform</p>                                                                                                                                 | <p><b>35. Which of the following are types of malignant melanoma?</b></p> <p>a) Superficial spreading</p> <p>b) Pinkus tumor</p> <p>c) Nodular</p> <p>d) Metatypical</p> <p>e) Acral lentiginous</p> <p>f) Morpheaform</p>                                                                                                                                                                               |
| <p><b>36. Aşağıdakilerden hangileri nevüsün malign transformasyon geliştirdiğini gösteren bulgulardır?</b></p> <p>a) Asimetrik görünüm</p> <p>b) Çok sayıda renk</p> <p>c) 6 mm'den küçük lezyon</p> <p>d) Sınır düzensizliği</p>                                                                                                              | <p><b>36. Which of the following findings indicate malignant transformation of a nevus?</b></p> <p>a) Asymmetric appearance</p> <p>b) Multiple colors</p> <p>c) Lesion smaller than 6 mm</p> <p>d) Irregular borders</p> <p>e) Patient age over 70 years</p> <p>f) Presence of multiple seborrheic keratoses</p>                                                                                         |

|                                                                                                                                                                                                                                                                                                                                                                                                                                        |                                                                                                                                                                                                                                                                                                                                                                                                                                                                  |
|----------------------------------------------------------------------------------------------------------------------------------------------------------------------------------------------------------------------------------------------------------------------------------------------------------------------------------------------------------------------------------------------------------------------------------------|------------------------------------------------------------------------------------------------------------------------------------------------------------------------------------------------------------------------------------------------------------------------------------------------------------------------------------------------------------------------------------------------------------------------------------------------------------------|
| <p>e) Hastanın 70 yaş üzerinde olması</p> <p>f) Çok sayıda seboreik keratoz eşlik etmesi</p>                                                                                                                                                                                                                                                                                                                                           |                                                                                                                                                                                                                                                                                                                                                                                                                                                                  |
| <p><b>37. Aşağıdakilerden hangileri vitiligo ayırıcı tanısında yer alır?</b></p> <p>a) Liken planus</p> <p>b) Tinea versikolor alba</p> <p>c) Psoriazis</p> <p>d) Mikozis fungoides</p> <p>e) Nevüs anemikus</p> <p>f) Kloasma</p>                                                                                                                                                                                                     | <p><b>37. Which of the following are included in the differential diagnosis of vitiligo?</b></p> <p>a) Lichen planus</p> <p>b) Tinea versicolor alba</p> <p>c) Psoriasis</p> <p>d) Mycosis fungoides</p> <p>e) Nevus anemicus</p> <p>f) Chloasma</p>                                                                                                                                                                                                             |
| <p><b>38. Liken planus için uygun olanları işaretleyiniz.</b></p> <p>a) Papüllerin üzerinde beyaz skuamalar şeklinde Wickham strialar görülür.</p> <p>b) Köbner fenomeni negatiftir.</p> <p>c) Oral mukozada en sık retiküler formu görülür.</p> <p>d) Eroziv-ülseratif formu uzun dönemde skuamöz hücreli karsinom riski taşır.</p> <p>e) Saçlı deride non-skatrisyel alopesi yapar.</p> <p>f) Spontan remisyon oldukça nadirdir.</p> | <p><b>38. Indicate the statements that are correct for lichen planus.</b></p> <p>a) Wickham striae appear as white scales on papules.</p> <p>b) The Koebner phenomenon is negative.</p> <p>c) The reticular form is most commonly seen in the oral mucosa.</p> <p>d) The erosive-ulcerative form carries a long-term risk of squamous cell carcinoma.</p> <p>e) It causes non-scarring alopecia on the scalp.</p> <p>f) Spontaneous remission is quite rare.</p> |
| <p><b>39. Psöriazis tırnağına ait özelliklerden tırnak yatak bulgusu olanları işaretleyiniz.</b></p> <p>a) Splinter hemoraji</p> <p>b) Lökonişi</p> <p>c) Yağ lekesi (salmon patch)</p> <p>d) Pitting</p> <p>e) Kırmızı lunula</p> <p>f) Subungual hiperkeratoz</p>                                                                                                                                                                    | <p><b>39. Indicate the nail bed findings associated with nail psoriasis.</b></p> <p>a) Splinter hemorrhages</p> <p>b) Leukonychia</p> <p>c) Oil drop (salmon patch)</p> <p>d) Pitting</p> <p>e) Red lunula</p> <p>f) Subungual hyperkeratosis</p>                                                                                                                                                                                                                |
| <p><b>40. Atopik dermatit tedavisinde risk faktörlerini azaltmak ve koruyucu önlemler almak önemlidir.</b></p>                                                                                                                                                                                                                                                                                                                         | <p><b>40. In the management of atopic dermatitis, reducing risk factors and implementing</b></p>                                                                                                                                                                                                                                                                                                                                                                 |

|                                                                                                                                                                                                                                                                                                                                                                                                                                                   |                                                                                                                                                                                                                                                                                                                                                                                                                                                                        |
|---------------------------------------------------------------------------------------------------------------------------------------------------------------------------------------------------------------------------------------------------------------------------------------------------------------------------------------------------------------------------------------------------------------------------------------------------|------------------------------------------------------------------------------------------------------------------------------------------------------------------------------------------------------------------------------------------------------------------------------------------------------------------------------------------------------------------------------------------------------------------------------------------------------------------------|
| <p><b>Aşağıdaki seçeneklerden hangileri bu önlemler arasında sayılır?</b></p> <p>a) Cildin uygun nemlendiricilerle nemlendirilmesi</p> <p>b) Yatak odası ısısının oda sıcaklığında tutulması</p> <p>c) Çiğ meyve ve sebzelerin tüketilmesine ağırlık verilmesi</p> <p>d) Güneşten korunmak için pencerelerde ağır ve kalın perdeler kullanılması</p> <p>e) Sık ve uzun banyolar yapılması</p> <p>f) Yünlü ve sentetik giysilerden kaçınılması</p> | <p><b>preventive measures is important. Which of the following are considered preventive measures?</b></p> <p>a) Moisturizing the skin with appropriate emollients</p> <p>b) Maintaining bedroom temperature at room level</p> <p>c) Emphasizing consumption of raw fruits and vegetables</p> <p>d) Using heavy, thick curtains on windows to protect from sunlight</p> <p>e) Taking frequent and prolonged baths</p> <p>f) Avoiding woolen and synthetic clothing</p> |
| <p><b>41. Hangileri bakteriyel deri enfeksiyonlarının ciddi lokal bulgularındandır?</b></p> <p>a) Sıcaklık artışı</p> <p>b) Anestezi</p> <p>c) Krepitasyon</p> <p>d) Eritem</p> <p>e) Hemorajik bül</p> <p>f) Ödem</p>                                                                                                                                                                                                                            | <p><b>41. Which of the following are serious local findings of bacterial skin infections?</b></p> <p>a) Increased local temperature</p> <p>b) Anesthesia</p> <p>c) Crepitation</p> <p>d) Erythema</p> <p>e) Hemorrhagic bullae</p> <p>f) Edema</p>                                                                                                                                                                                                                     |
| <p><b>42. Sifiliz ikinci evresine ait klinik tabloları işaretleyiniz.</b></p> <p>a) Şankr (ulkus durum)</p> <p>b) Kondiloma lata</p> <p>c) Palmoplantar sifilid</p> <p>d) Sifiliz tüberoza</p> <p>e) Güve yeniği şeklinde alopesi</p> <p>f) Sifiliz gommoza</p>                                                                                                                                                                                   | <p><b>42. Indicate the clinical manifestations of secondary syphilis.</b></p> <p>a) Chancre (ulcus durum)</p> <p>b) Condyloma lata</p> <p>c) Palmoplantar syphilid</p> <p>d) Tubercular syphilis</p> <p>e) Moth-eaten alopecia</p> <p>f) Gummatous syphilis</p>                                                                                                                                                                                                        |
| <p><b>43. Hafif şiddetli yalnızca komedonal aknesi olan hastada ön planda tercih edilecek ilaçları işaretleyiniz.</b></p> <p>a) Topikal retinoid</p>                                                                                                                                                                                                                                                                                              | <p><b>43. In a patient with mild acne presenting only with comedonal lesions, which medications should be preferred as first-line treatment?</b></p> <p>a) Topical retinoid</p>                                                                                                                                                                                                                                                                                        |

|                                                                                                                                                                                                                                                                               |                                                                                                                                                                                                                                                                                                                                        |
|-------------------------------------------------------------------------------------------------------------------------------------------------------------------------------------------------------------------------------------------------------------------------------|----------------------------------------------------------------------------------------------------------------------------------------------------------------------------------------------------------------------------------------------------------------------------------------------------------------------------------------|
| <p>b) Oral retinoid</p> <p>c) Azelaik asit</p> <p>d) Salisilik asit</p> <p>e) Topikal antibiyotik</p> <p>f) Oral antibiyotik</p>                                                                                                                                              | <p>b) Oral retinoid</p> <p>c) Azelaic acid</p> <p>d) Salicylic acid</p> <p>e) Topical antibiotic</p> <p>f) Oral antibiotic</p>                                                                                                                                                                                                         |
| <p><b>44. Aşağıdakilerden hangileri akne rozase ile ilişkilidir.</b></p> <p>a) Püstül görülmez</p> <p>b) Komedon görülmez</p> <p>c) Göz tutulumu olabilir</p> <p>d) En sık pubertede görülür</p> <p>e) Yüz orta hattını tutar</p> <p>f) Akne konglobata şiddetli formudur</p> | <p><b>44. Which of the following are associated with acne rosacea?</b></p> <p>a) Pustules are not observed</p> <p>b) Comedones are absent</p> <p>c) Ocular involvement may occur</p> <p>d) It is most commonly seen during puberty</p> <p>e) It involves the central face</p> <p>f) It represents a severe form of acne conglobata</p> |

**Table S2.3. Text-only matching questions**

|                                                                                                                                                                                                                                                                                                                                                                                                                        |                                                                                                                                                                                                                                                                                                                                                                                                                                            |
|------------------------------------------------------------------------------------------------------------------------------------------------------------------------------------------------------------------------------------------------------------------------------------------------------------------------------------------------------------------------------------------------------------------------|--------------------------------------------------------------------------------------------------------------------------------------------------------------------------------------------------------------------------------------------------------------------------------------------------------------------------------------------------------------------------------------------------------------------------------------------|
| <p><b>45. Kavram ve tanımlarını eşleştiriniz.</b></p> <p>A. Serpiginöz</p> <p>B. Grube</p> <p>C. Diskret / izole</p> <p>D. Targetoid</p> <p>E. Lineer</p> <p>1. Birbirlerine bitişik kümelenmiş</p> <p>2. Dalga benzeri veya yılankavi</p> <p>3. Çizgi şeklinde</p> <p>4. Birbirinden farklı renk zonları olan hedef tahtası benzeri</p> <p>5. Biri diğerinden ayrı</p> <p>A – ... B – ... C – ... D – ... E – ...</p> | <p><b>45. Match the terms with their definitions.</b></p> <p>A. Serpiginous</p> <p>B. Grouped</p> <p>C. Discrete / isolated</p> <p>D. Targetoid</p> <p>E. Linear</p> <p>1. Clustered and contiguous lesions</p> <p>2. Wavy or snake-like pattern</p> <p>3. Arranged in a linear pattern</p> <p>4. Target-like appearance with concentric color zones</p> <p>5. Separate from each other</p> <p>A – ... B – ... C – ... D – ... E – ...</p> |
|------------------------------------------------------------------------------------------------------------------------------------------------------------------------------------------------------------------------------------------------------------------------------------------------------------------------------------------------------------------------------------------------------------------------|--------------------------------------------------------------------------------------------------------------------------------------------------------------------------------------------------------------------------------------------------------------------------------------------------------------------------------------------------------------------------------------------------------------------------------------------|

|                                                                                                                                                                                                                                                                                                                                                                          |                                                                                                                                                                                                                                                                                                                                                                                             |
|--------------------------------------------------------------------------------------------------------------------------------------------------------------------------------------------------------------------------------------------------------------------------------------------------------------------------------------------------------------------------|---------------------------------------------------------------------------------------------------------------------------------------------------------------------------------------------------------------------------------------------------------------------------------------------------------------------------------------------------------------------------------------------|
| <p><b>46. Aşağıdaki hastalıklarda görülen elementer lezyonu eşleştiriniz.</b></p> <p>A. Furonkül<br/>B. Pemfigus vulgaris<br/>C. Psöriyazis vulgaris<br/>D. Liken planus<br/>E. Herpes simpleks</p> <p>1. Vezikül<br/>2. Plak<br/>3. Papül<br/>4. Nodül<br/>5. Bül</p> <p>A – ... B – ... C – ... D – ... E – ...</p>                                                    | <p><b>46. Match the diseases with their characteristic elementary lesions.</b></p> <p>A. Furuncle<br/>B. Pemphigus vulgaris<br/>C. Psoriasis vulgaris<br/>D. Lichen planus<br/>E. Herpes simplex</p> <p>1. Vesicle<br/>2. Plaque<br/>3. Papule<br/>4. Nodule<br/>5. Bulla</p> <p>A – ... B – ... C – ... D – ... E – ...</p>                                                                |
| <p><b>47. Aşağıdaki hastalıkları semptom ve bulgularıyla eşleştiriniz.</b></p> <p>A. İmpetigo<br/>B. Skabiyez<br/>C. Psöriyazis vulgaris<br/>D. Ürtiker<br/>E. Pedikülozis kapitis</p> <p>1. Diz–dirsek tutulumu<br/>2. Saçlarda keçeleşme, kötü koku<br/>3. Bal rengi kurut<br/>4. Hebra halkası<br/>5. 4K belirtisi</p> <p>A – ... B – ... C – ... D – ... E – ...</p> | <p><b>47. Match the following diseases with their symptoms and clinical findings.</b></p> <p>A. Impetigo<br/>B. Scabies<br/>C. Psoriasis vulgaris<br/>D. Urticaria<br/>E. Pediculosis capitis</p> <p>1. Involvement of knees and elbows<br/>2. Matted hair with foul odor<br/>3. Honey-colored crusts<br/>4. Hebra ring<br/>5. “4K” sign</p> <p>A – ... B – ... C – ... D – ... E – ...</p> |
| <p><b>48. Tanımlamalar ve hastalıkları eşleştiriniz.</b></p> <p>A. Hipopigmente yama<br/>B. Tokatlanmış yanak bulgusu<br/>C. Göbekli vezikül</p>                                                                                                                                                                                                                         | <p><b>48. Match the descriptions with the corresponding diseases.</b></p> <p>A. Hypopigmented patch<br/>B. Slapped cheek appearance</p>                                                                                                                                                                                                                                                     |

|                                                                                                                                                                                                                                                                                                                                                                                                                                            |                                                                                                                                                                                                                                                                                                                                                                                                                                                                                  |
|--------------------------------------------------------------------------------------------------------------------------------------------------------------------------------------------------------------------------------------------------------------------------------------------------------------------------------------------------------------------------------------------------------------------------------------------|----------------------------------------------------------------------------------------------------------------------------------------------------------------------------------------------------------------------------------------------------------------------------------------------------------------------------------------------------------------------------------------------------------------------------------------------------------------------------------|
| <p>D. Koplik lekesi</p> <p>E. Madalyon plak</p> <p>1. Varisella</p> <p>2. Eritema infeksiyozum</p> <p>3. Pitriyazis rozea</p> <p>4. Kızamık</p> <p>5. Mikozis fungoides</p> <p>A – ... B – ... C – ... D – ... E – ...</p>                                                                                                                                                                                                                 | <p>C. Umbilicated vesicle</p> <p>D. Koplik spot</p> <p>E. Herald patch</p> <p>1. Varicella</p> <p>2. Erythema infectiosum</p> <p>3. Pityriasis rosea</p> <p>4. Measles</p> <p>5. Mycosis fungoides</p> <p>A – ... B – ... C – ... D – ... E – ...</p>                                                                                                                                                                                                                            |
| <p><b>49. Kolajen doku hastalıkları ile bulgularını eşleştiriniz.</b></p> <p>A. Sistemik lupus eritematozus</p> <p>B. Morfea</p> <p>C. Dermatomiyozit</p> <p>D. Sistemik skleroz</p> <p>E. Diskoid lupus eritematozus</p> <p>1. Malar raş</p> <p>2. Sikatrisyel alopesi</p> <p>3. Leylak rengi plak</p> <p>4. Artmış malignite birlikteliği</p> <p>5. Parmaklarda fleksiyon kontraktürü</p> <p>A – ... B – ... C – ... D – ... E – ...</p> | <p><b>49. Match the collagen vascular diseases with their characteristic findings.</b></p> <p>A. Systemic lupus erythematosus</p> <p>B. Morphea</p> <p>C. Dermatomyositis</p> <p>D. Systemic sclerosis</p> <p>E. Discoid lupus erythematosus</p> <p>1. Malar rash</p> <p>2. Cicatricial alopecia</p> <p>3. Lilac-colored plaque</p> <p>4. Increased association with malignancy</p> <p>5. Flexion contractures of the fingers</p> <p>A – ... B – ... C – ... D – ... E – ...</p> |
| <p><b>50. İlaç reaksiyonları ve özelliklerini eşleştiriniz.</b></p> <p>A. Fiks ilaç erüpsiyonu</p> <p>B. DRESS sendromu</p> <p>C. Akut jeneralize egzematöz püstüloz</p> <p>D. Makülopapüler ilaç reaksiyonu</p> <p>E. Likenoid ilaç reaksiyonu</p> <p>1. Aynı yerde tekrarlayan, pigmentasyon bırakabilen</p> <p>2. Eritemli zeminde non-foliküler püstüller ve</p>                                                                       | <p><b>50. Match the drug reactions with their characteristic features.</b></p> <p>A. Fixed drug eruption</p> <p>B. DRESS syndrome</p> <p>C. Acute generalized exanthematous pustulosis</p> <p>D. Maculopapular drug reaction</p> <p>E. Lichenoid drug reaction</p> <p>1. Recurs at the same site and may leave</p>                                                                                                                                                               |

|                                                                                                                                                                             |                                                                                                                                                                                                                                                                                   |
|-----------------------------------------------------------------------------------------------------------------------------------------------------------------------------|-----------------------------------------------------------------------------------------------------------------------------------------------------------------------------------------------------------------------------------------------------------------------------------|
| nötrofili görülen<br>3. Eozinofili, multi-organ tutulumu ve yüz ödemi sık görülen<br>4. En sık görülen<br>5. En geç ortaya çıkan<br>A – ... B – ... C – ... D – ... E – ... | pigmentation<br>2. Non-follicular pustules on an erythematous background with neutrophilia<br>3. Frequently associated with eosinophilia, multi-organ involvement, and facial edema<br>4. Most common drug reaction<br>5. Latest onset<br>A – ... B – ... C – ... D – ... E – ... |
|-----------------------------------------------------------------------------------------------------------------------------------------------------------------------------|-----------------------------------------------------------------------------------------------------------------------------------------------------------------------------------------------------------------------------------------------------------------------------------|

**Table S2.4. Text-only examination answer key**

| Question # | Correct Answer(s) |  |  |  |  |
|------------|-------------------|--|--|--|--|
| 1.         | E                 |  |  |  |  |
| 2.         | D                 |  |  |  |  |
| 3.         | C                 |  |  |  |  |
| 4.         | A                 |  |  |  |  |
| 5.         | D                 |  |  |  |  |
| 6.         | C                 |  |  |  |  |
| 7.         | E                 |  |  |  |  |
| 8.         | C                 |  |  |  |  |
| 9.         | E                 |  |  |  |  |
| 10.        | A                 |  |  |  |  |
| 11.        | B                 |  |  |  |  |
| 12.        | A                 |  |  |  |  |
| 13.        | B                 |  |  |  |  |
| 14.        | C                 |  |  |  |  |
| 15.        | B                 |  |  |  |  |
| 16.        | A                 |  |  |  |  |
| 17.        | E                 |  |  |  |  |
| 18.        | D                 |  |  |  |  |
| 19.        | A                 |  |  |  |  |
| 20.        | C                 |  |  |  |  |
| 21.        | B                 |  |  |  |  |
| 22.        | D                 |  |  |  |  |
| 23.        | A                 |  |  |  |  |
| 24.        | B                 |  |  |  |  |
| 25.        | D                 |  |  |  |  |
| 26.        | A                 |  |  |  |  |
| 27.        | E                 |  |  |  |  |

|     |     |     |     |     |     |
|-----|-----|-----|-----|-----|-----|
| 28. | C   |     |     |     |     |
| 29. | D   |     |     |     |     |
| 30. | E   |     |     |     |     |
| 31. | A   |     |     |     |     |
| 32. | A   | B   | E   |     |     |
| 33. | A   | C   | D   |     |     |
| 34. | A   | C   | D   |     |     |
| 35. | A   | C   | E   |     |     |
| 36. | A   | B   | D   |     |     |
| 37. | B   | D   | E   |     |     |
| 38. | A   | C   | D   |     |     |
| 39. | A   | C   | F   |     |     |
| 40. | A   | B   | F   |     |     |
| 41. | B   | C   | E   |     |     |
| 42. | B   | C   | E   |     |     |
| 43. | A   | C   | D   |     |     |
| 44. | B   | C   | E   |     |     |
| 45. | A-2 | B-1 | C-5 | D-4 | E-3 |
| 46. | A-4 | B-5 | C-2 | D-3 | E-1 |
| 47. | A-3 | B-4 | C-1 | D-5 | E-2 |
| 48. | A-5 | B-2 | C-1 | D-4 | E-3 |
| 49. | A-1 | B-3 | C-4 | D-5 | E-2 |
| 50. | A-1 | B-3 | C-2 | D-4 | E-5 |
