# Supplementary material
Source: Research Square preprint supplement (doi:10.21203/rs.3.rs-8480126/v1)
Supplement: Supplementary file 2 [file b5e3e2584e16d43556fc150a.pdf]

## **Performance of Vision–Language Models Compared with 252 Medical Students on Text-only and Image-based Dermatology Examinations**

Ozan Erdem, Asst. Prof. Dr.<sup>1</sup>, Abdurrahim Yılmaz, MS<sup>2</sup>, Ahmet Sait Şahin, MD<sup>1</sup>, Buğra Burç Dağtaş, MD<sup>3</sup>, Ece Gökyayla, Asst. Prof. Dr.<sup>4</sup>, Melek Aslan Kayıran, Assoc. Prof. Dr.<sup>1</sup>, Vefa Aslı Erdemir, Prof. Dr.<sup>1</sup>, Mehmet Salih Gürel, Prof. Dr.<sup>1</sup>

<sup>1</sup>Department of Dermatology and Venereology, Istanbul Medeniyet University, Istanbul, Turkey

<sup>2</sup> Division of Systems Medicine, Department of Metabolism, Digestion and Reproduction, Imperial College London, London, UK

<sup>3</sup>Department of Dermatology and Venereology, Health Sciences University, Istanbul Teaching and Research Hospital, Istanbul, Turkey

<sup>4</sup>Department of Dermatology and Venereology, Ege University, Istanbul, Turkey

## **Supplementary Information 1. Standardized Prompt Templates (Original Turkish and English Translations) Used for Text-only and Image-based Dermatology Clerkship Examinations**

This supplementary file presents the standardized prompt templates used to evaluate AI models on the dermatology clerkship examinations. All prompt templates were originally written in Turkish and were applied identically across models and examination items, without modification during model testing. The analyses were conducted using the original Turkish prompts and responses; the English translations are provided for transparency and reader accessibility only.

### **Text-only Examination Prompt Templates**

Text-only items were submitted in grouped batches by question format. Each prompt explicitly constrained the response format (single-choice, multiple-select, or matching) to minimize variation in answer structure and to discourage explanatory output.

**Table S1.1. Text-only multiple-choice prompt template**

| <b>Original Turkish Prompt</b>                                                                                                                                                                                                                                                           | <b>English Translation</b>                                                                                                                                                                                                                                                                                                         |
|------------------------------------------------------------------------------------------------------------------------------------------------------------------------------------------------------------------------------------------------------------------------------------------|------------------------------------------------------------------------------------------------------------------------------------------------------------------------------------------------------------------------------------------------------------------------------------------------------------------------------------|
| Aşağıda dermatoloji alanında hazırlanmış çoktan seçmeli sınav soruları bulunmaktadır. Senin görevin bu sorulara kesin ve net bir şekilde yanıt vermektir. Her sorunun tek bir doğru cevabı vardır. Yanıtını sadece seçeneğin harfi olarak ver (örnek: A). Açıklama veya ek bilgi ekleme. | Below are multiple-choice examination questions prepared in the field of dermatology. Your task is to answer these questions clearly and definitively. Each question has only one correct answer. Provide your response using only the letter of the selected option (e.g., A). Do not add explanations or additional information. |

**Table S1.2. Text-only multiple-select prompt template**

| <b>Original Turkish Prompt</b>                                                                                                                                                                                                                                                         | <b>English Translation</b>                                                                                                                                                                                                                                                                                            |
|----------------------------------------------------------------------------------------------------------------------------------------------------------------------------------------------------------------------------------------------------------------------------------------|-----------------------------------------------------------------------------------------------------------------------------------------------------------------------------------------------------------------------------------------------------------------------------------------------------------------------|
| Aşağıda dermatoloji alanında hazırlanmış çoklu seçmeli sınav soruları bulunmaktadır. Senin görevin bu sorulara kesin ve net bir şekilde yanıt vermektir. Her sorunun 3 doğru cevabı vardır. Yanıtını sadece 3 harf olacak şekilde ver (örnek: A, B, C). Açıklama veya ek bilgi ekleme. | Below are multiple-select examination questions prepared in the field of dermatology. Your task is to answer these questions clearly and definitively. Each question has three correct answers. Provide your response using exactly three letters (e.g., A, B, C). Do not add explanations or additional information. |

**Table S1.3. Text-only matching prompt template**

| <b>Original Turkish Prompt</b>                                                                                                                                                                                                                                                        | <b>English Translation</b>                                                                                                                                                                                                                                                                                                       |
|---------------------------------------------------------------------------------------------------------------------------------------------------------------------------------------------------------------------------------------------------------------------------------------|----------------------------------------------------------------------------------------------------------------------------------------------------------------------------------------------------------------------------------------------------------------------------------------------------------------------------------|
| Aşağıda dermatoloji alanında hazırlanmış eşleştirme sınav soruları bulunmaktadır. Senin görevin bu sorulara kesin ve net bir şekilde yanıt vermektir. Yanıtını her harf için karşılık gelen numarayı tek satırda yaz (örnek: A-1, B-2, C-3, D-4, E-5). Açıklama veya ek bilgi ekleme. | Below are matching examination questions prepared in the field of dermatology. Your task is to answer these questions clearly and definitively. Provide your response on a single line by matching each letter with the corresponding number (e.g., A-1, B-2, C-3, D-4, E-5). Do not add explanations or additional information. |

### **Image-based Examination Prompt Templates**

All image-based items required structured, open-ended responses and were submitted individually. Prompts explicitly specified the expected number and type of answers and imposed concise formatting constraints to reduce variability in response length and structure.

**Table S1.4. Image-based elementary lesion recognition prompt template**

| <b>Original Turkish Prompt</b>                                                                                                                        | <b>English Translation</b>                                                                                                                    |
|-------------------------------------------------------------------------------------------------------------------------------------------------------|-----------------------------------------------------------------------------------------------------------------------------------------------|
| Aşağıda dermatoloji alanında hazırlanmış bir görsel sınav sorusu bulunmaktadır. Görseli incele ve gördüğün elementer lezyonları yaz. Sorunun yalnızca | Below is an image-based examination question prepared in the field of dermatology. Examine the image and list the elementary skin lesions you |

|                                                                                                                                                                                                                                                          |                                                                                                                                                                                                                                                                                                                     |
|----------------------------------------------------------------------------------------------------------------------------------------------------------------------------------------------------------------------------------------------------------|---------------------------------------------------------------------------------------------------------------------------------------------------------------------------------------------------------------------------------------------------------------------------------------------------------------------|
| <p>3 kısa yanıtı vardır. En belirgin elementer lezyonu önce, diğerlerini ardından yaz. Yanıtını yalnızca kısa terimler halinde, tek satırda ve virgülle ayırarak ver.</p> <p>Ek açıklama ekleme, sadece yanıtı yaz. Örnek:</p> <p>Makül, papül, plak</p> | <p>observe. The question requires exactly three short answers. Write the most prominent elementary lesion first, followed by the others. Provide your response using only short terms, on a single line, separated by commas. Do not add explanations; provide only the answer. Example: macule, papule, plaque</p> |
|----------------------------------------------------------------------------------------------------------------------------------------------------------------------------------------------------------------------------------------------------------|---------------------------------------------------------------------------------------------------------------------------------------------------------------------------------------------------------------------------------------------------------------------------------------------------------------------|

**Table S1.5. Image-based descriptive reporting prompt template**

| <b>Original Turkish Prompt</b>                                                                                                                                                                                                                                                                                                                                                                                                                                                                                                                                                                                                                                                                                                                                                                  | <b>English Translation</b>                                                                                                                                                                                                                                                                                                                                                                                                                                                                                                                                                                                                                                                                                                                                                                                                                                                                                                                   |
|-------------------------------------------------------------------------------------------------------------------------------------------------------------------------------------------------------------------------------------------------------------------------------------------------------------------------------------------------------------------------------------------------------------------------------------------------------------------------------------------------------------------------------------------------------------------------------------------------------------------------------------------------------------------------------------------------------------------------------------------------------------------------------------------------|----------------------------------------------------------------------------------------------------------------------------------------------------------------------------------------------------------------------------------------------------------------------------------------------------------------------------------------------------------------------------------------------------------------------------------------------------------------------------------------------------------------------------------------------------------------------------------------------------------------------------------------------------------------------------------------------------------------------------------------------------------------------------------------------------------------------------------------------------------------------------------------------------------------------------------------------|
| <p>Aşağıda dermatoloji alanında hazırlanmış bir görsel sınav sorusu bulunmaktadır. Görseli incele ve dermatolojik muayene bulgularını yaz. Yanıtında lezyonun şu özellikleri yer alabilir: lokalizasyon, dağılım paterni, büyüklük, sayı, şekil, kenar özellikleri, yüzey özellikleri, yerleşim derinliği, sekonder değişiklikler, renk, elementer lezyon. Raporunda en belirgin 5 özellik yer almalıdır. Özellikleri en belirgin olandan başlayarak, kısa ve tıbbi terimlerle, virgül ile ayırarak yaz. Rapor, bir dermatoloğun muayene notu gibi olmalı, ek açıklama veya yorum içermemelidir. Örnek: Sağ göz çevresi ve alın sağ yarımında yerleşen, orta hattan keskin sınırla ayrılmış, ortalama birkaç milimetre büyüklüğünde, çok sayıda, zemini eritemli, grube veziküller izlendi.</p> | <p>Below is an image-based examination question prepared in the field of dermatology. Examine the image and describe the dermatologic examination findings. Your response may include the following lesion characteristics: localization, distribution pattern, size, number, shape, border characteristics, surface features, depth of involvement, secondary changes, color, and elementary lesion type. Your report should include the five most prominent features. List these features starting with the most prominent, using concise medical terminology and separating them with commas. The report should resemble a dermatologist's clinical examination note and should not include additional explanations or commentary. Example: Multiple, grouped erythematous vesicles, measuring a few millimeters on average, located in the right periorbital area and right half of the forehead, sharply demarcated at the midline.</p> |

**Table S1.6. Image-based diagnosis prompt template**

| <b>Original Turkish Prompt</b>                                                                                                                                                                                                                                                         | <b>English Translation</b>                                                                                                                                                                                                                                                                                                                     |
|----------------------------------------------------------------------------------------------------------------------------------------------------------------------------------------------------------------------------------------------------------------------------------------|------------------------------------------------------------------------------------------------------------------------------------------------------------------------------------------------------------------------------------------------------------------------------------------------------------------------------------------------|
| Aşağıda dermatoloji alanında hazırlanmış bir görsel sınav sorusu bulunmaktadır. Görseli incele ve klinik tablo ile en uyumlu tanıyı yaz. Sorunun yalnızca 1 kısa yanıtı vardır. Yanıtında sadece en olası tanıyı belirt. Ek açıklama ekleme, sadece yanıtı yaz. Örnek: Atopik dermatit | Below is an image-based examination question prepared in the field of dermatology. Examine the image and write the diagnosis most consistent with the clinical presentation. The question requires only one short answer. Provide only the most likely diagnosis. Do not add explanations; provide only the answer. Example: atopic dermatitis |

**Table S1.7. Image-based etiology prompt template**

| <b>Original Turkish Prompt</b>                                                                                                                                                                                                                                                                            | <b>English Translation</b>                                                                                                                                                                                                                                                                                                                        |
|-----------------------------------------------------------------------------------------------------------------------------------------------------------------------------------------------------------------------------------------------------------------------------------------------------------|---------------------------------------------------------------------------------------------------------------------------------------------------------------------------------------------------------------------------------------------------------------------------------------------------------------------------------------------------|
| Aşağıda dermatoloji alanında hazırlanmış bir görsel sınav sorusu bulunmaktadır. Görseli incele ve klinik tabloya neden olabilecek en olası etiyolojik etkeni yaz. Sorunun yalnızca 1 kısa yanıtı vardır. Yanıtında sadece en olası etkeni belirt. Ek açıklama ekleme, sadece yanıtı yaz. Örnek: S. aureus | Below is an image-based examination question prepared in the field of dermatology. Examine the image and write the most likely etiological agent responsible for the clinical presentation. The question requires only one short answer. Provide only the most likely agent. Do not add explanations; provide only the answer. Example: S. aureus |

**Table S1.8. Image-based differential diagnosis prompt template**

| <b>Original Turkish Prompt</b>                                                                                                                                                                                                                                                                                                                                                                                      | <b>English Translation</b>                                                                                                                                                                                                                                                                                                                                                                                                                                                                               |
|---------------------------------------------------------------------------------------------------------------------------------------------------------------------------------------------------------------------------------------------------------------------------------------------------------------------------------------------------------------------------------------------------------------------|----------------------------------------------------------------------------------------------------------------------------------------------------------------------------------------------------------------------------------------------------------------------------------------------------------------------------------------------------------------------------------------------------------------------------------------------------------------------------------------------------------|
| <p>Aşağıda dermatoloji alanında hazırlanmış bir görsel sınav sorusu bulunmaktadır. Görseli incele ve ayırıcı tanıya girebilecek hastalıkları yaz. Sorunun yalnızca 3 kısa yanıtı vardır. En olası tanıyı önce, diğerlerini ardından yaz. Yanıtını yalnızca kısa terimler halinde, tek satırda ve virgülle ayırarak ver. Ek açıklama ekleme, sadece yanıtı yaz. Örnek: Akne vulgaris, rozasea, perioral dermatit</p> | <p>Below is an image-based examination question prepared in the field of dermatology. Examine the image and list the conditions that should be included in the differential diagnosis. The question requires exactly three short answers. Write the most likely diagnosis first, followed by the others. Provide your response using only short terms, on a single line, separated by commas. Do not add explanations; provide only the answer. Example: acne vulgaris, rosacea, perioral dermatitis</p> |

**Table S1.9. Image-based treatment prompt template**

| <b>Original Turkish Prompt</b>                                                                                                                                                                                                                                                                                                                                                                                                                                               | <b>English Translation</b>                                                                                                                                                                                                                                                                                                                                                                                                                                                                                                                                 |
|------------------------------------------------------------------------------------------------------------------------------------------------------------------------------------------------------------------------------------------------------------------------------------------------------------------------------------------------------------------------------------------------------------------------------------------------------------------------------|------------------------------------------------------------------------------------------------------------------------------------------------------------------------------------------------------------------------------------------------------------------------------------------------------------------------------------------------------------------------------------------------------------------------------------------------------------------------------------------------------------------------------------------------------------|
| <p>Aşağıda dermatoloji alanında hazırlanmış bir görsel sınav sorusu bulunmaktadır. Görseli incele ve hastanın tedavisinde kullanılabilecek ilaçları yaz. Sorunun yalnızca 5 kısa yanıtı vardır. En sık kullanılan tedaviyi önce, diğerlerini ardından yaz. Yanıtını yalnızca kısa terimler halinde, tek satırda ve virgülle ayırarak ver. Ek açıklama ekleme, sadece yanıtı yaz. Örnek: Ketokonazol, siklopiroks olamin, çinko piriton, selenyum sülfid, topikal steroid</p> | <p>Below is an image-based examination question prepared in the field of dermatology. Examine the image and list the medications that may be used in the treatment of the patient. The question requires exactly five short answers. Write the most commonly used treatment first, followed by the others. Provide your response using only short terms, on a single line, separated by commas. Do not add explanations; provide only the answer. Example: ketoconazole, ciclopirox olamine, zinc pyrithione, selenium sulfide, topical corticosteroid</p> |

**Table S1.10. Image-based general knowledge prompt template**

| <b>Original Turkish Prompt</b>                                                                                                                                                                                                                                                                                                                                                                     | <b>English Translation</b>                                                                                                                                                                                                                                                                                                                                                                                                                                              |
|----------------------------------------------------------------------------------------------------------------------------------------------------------------------------------------------------------------------------------------------------------------------------------------------------------------------------------------------------------------------------------------------------|-------------------------------------------------------------------------------------------------------------------------------------------------------------------------------------------------------------------------------------------------------------------------------------------------------------------------------------------------------------------------------------------------------------------------------------------------------------------------|
| <p>Aşağıda dermatoloji alanında hazırlanmış bir görsel sınav sorusu bulunmaktadır. Görseli incele ve görsel içerisindeki soruyu tespit et. Soruya en uygun yanıtı ver. Sorunun yalnızca 5 kısa yanıtı vardır. Yanıtını yalnızca kısa terimler halinde, tek satırda ve virgülle ayırarak ver. Ek açıklama ekleme, sadece yanıtı yaz.</p> <p>Örnek: FSH, LH, DHEAS, Prolaktin, 17-OH Progesteron</p> | <p>Below is an image-based examination question prepared in the field of dermatology. Examine the image and identify the question embedded within the visual. Provide the most appropriate answer to that question. The question requires exactly five short answers. Provide your response using only short terms, on a single line, separated by commas. Do not add explanations; provide only the answer. Example: FSH, LH, DHEAS, prolactin, 17-OH progesterone</p> |
